23 **ABSTRACT:** Bycatch impacts on non-target species present significant management  
24 problems in diverse fisheries throughout the world. Despite successful efforts to  
25 minimize bycatch in US West Coast Pacific Hake fisheries, these impacts remain a  
26 concern, particularly for sensitive populations of Chinook Salmon. NOAA Fisheries  
27 needed predictive models to estimate proportions of Chinook Salmon Evolutionarily  
28 Significant Units (ESUs) expected in bycatch. We used genetic mixture analysis to  
29 estimate ESU proportions from at-sea bycatch between 2008 and 2015. Using latitude as  
30 a predictor and applying jackknife cross validation, we found Dirichlet regression more  
31 accurately estimated abundant ESUs, whereas multinomial logistic regression performed  
32 better with rare ESUs. This targeted, ESU-specific approach showed the spatial  
33 distribution of sensitive stocks in bycatch and supported NOAA's obligations to forecast  
34 impacts on listed ESUs. The overarching goal of this continuing work is to maximize  
35 sustainable harvest while protecting threatened and endangered Chinook Salmon ESUs.

36

## INTRODUCTION

37 Pacific Hake<sup>1</sup> (*Merluccius productus*) are distributed from the Gulf of Alaska to  
38 the Gulf of California (Quirollo et al. 2001). This abundant marine resource supports a  
39 large-scale trawl fishery off the US West Coast. Trawling in this region began slowly in  
40 the 1870s but increased in the 1920s with implementation of diesel engines and other  
41 technological advances (Easley 2001). By 1966 harvest reached 137 kMT and now  
42 represents an important economic resource to the region and to the nation (Hamel et al.  
43 2015). In 2016, commercial landings of Pacific Hake totaled more than 260.8 kMT  
44 valued at over US\$42 million (NOAA 2019).

45

### *Incidental Take Statement for the US West Coast groundfish fisheries*

47 Despite much effort and management action to reduce impacts on non-target  
48 species, bycatch remains a concern in this commercially important fishery (Somers et al.  
49 2015). There is special concern for bycatch of Chinook Salmon (*Oncorhynchus*  
50 *tshawytscha*) protected under the US Endangered Species Act (ESA). By international  
51 treaty (PSC 2020), management of coastal Pacific hake fisheries is shared among  
52 Canadian Department of Fisheries and Oceans, NOAA Fisheries, and the Joint  
53 Management Committee. In cooperation with the Pacific Fishery Management  
54 Council (PFMC), NOAA manages the Pacific Hake fishery on the US West Coast in  
55 Federal waters (3 to 200 miles offshore). Federal agencies must consult with NOAA on  
56 activities that might jeopardize the continued existence of protected marine species  
57 (essentially any action that involves “take”). As part of the 2017 ESA Consultation for  
58 the West Coast Groundfish Fishery Management Plan salmon biological opinion (BiOp),

---

<sup>1</sup> Also referred to by the industry name “Pacific whiting”

59 the PFMC and NOAA faced a series of questions related to alternative fishery regulation  
60 scenarios. For example: What would be the actual number of Chinook Salmon  
61 individuals in bycatch from each Evolutionarily Significant Unit (ESU), if the current  
62 restriction were rescinded on processing Pacific Hake south of latitude 42? What if there  
63 was a resumption of the tribal mothership fishery off the north coast of Washington  
64 State? Ultimately, NOAA's Incidental Take Statement needed to forecast the actual  
65 number of Chinook Salmon from each ESU taken in bycatch, given predicted spatial  
66 distribution of fishing effort (Matson and Erickson 2018) and under different  
67 management scenarios (NMFS—WCR 2017).

68

### 69 *Limited CWT recoveries in bycatch*

70 Tiny coded-wire tags (CWTs) are implanted in the snouts of juvenile hatchery  
71 fish, and much has been learned about Chinook Salmon migration patterns and ocean  
72 distribution from CWT recoveries (Weitkamp 2010; Riddell et al. 2018; Shelton et al  
73 2019). We know that particular stocks have characteristic patterns of tag recovery,  
74 primarily in commercial salmon harvest. Importantly, these patterns of migration were  
75 shown to be surprisingly stable across years, despite high interannual variation in ocean  
76 conditions and relative abundance (Weitkamp 2010). In spite of broad utility in harvest  
77 management and basic research, coded-wire-tag recoveries in bycatch have generally  
78 been inadequate to estimate relative abundance and distribution of 17 ESUs (identified in  
79 Appendix 1). In parallel with tissue sampling, only 687 CWTs were recovered from  
80 among 9,862 Chinook Salmon sampled by NOAA At-Sea Observers over the 8 years of  
81 this study (2008 – 2015). Therefore, genetic analysis, where every fish, hatchery and wild,

82 is effectively “tagged,” presented an opportunity to significantly augment what was  
83 known from sparse CWT recoveries (NMFS—WCR 2017).

84

85 In the current study, we used genetic mixture analysis to characterize stock  
86 composition of Chinook Salmon ESUs in the US West Coast, at-sea, Pacific Hake fishery.  
87 We also tested accuracy and precision of different predictive regression models used to  
88 forecast ESU impacts in a management context; the goal being to provide the most  
89 powerful forecasting tool requiring the simplest possible inputs. Beyond specific interest  
90 to salmon conservation and Pacific hake harvest, our results are relevant to broader  
91 studies of more general statistical challenges of multinomial regression modeling and  
92 measures of forecasting accuracy—both common problems in ecology and natural  
93 resource management.

94

95

## MATERIALS AND METHODS

96 NOAA’s At-Sea Hake Observer Program (A-SHOP) collected Chinook Salmon  
97 tissue samples from the catcher/processor, mothership, and at-sea tribal sectors (NWFSC  
98 2021). Rayed fin-clip samples were folded in Whatman 3MM chromatography paper,  
99 dried immediately, and stored in barcoded coin envelopes at ambient temperature.  
100 Samples were deposited in the Northwest Fisheries Science Center (NWFSC)  
101 Conservation Biology Division’s Genetic Tissue Archive (accession numbers in Table 1).  
102 All samples were collected during the normal fishing season beginning 15 May and  
103 ending 31 December. Tissue samples selected for genotyping (4,498) were drawn  
104 randomly each year between 2008 and 2015. Annual sample sizes were dictated by  
105 project resources available in a given year, not total bycatch. Table 1 illustrates the

106 filtering process and identifies the following: total estimated bycatch, samples collected  
107 by observers, random sub-sample for genotyping, and filtered for genotyping quality and  
108 filtered for  $\geq 0.8$  assignment probability. The latter two sample sets provided the primary  
109 input data for this study and reflect two distinctly different statistical approaches; 1)  
110 modeled genetic stock composition estimates based on all individuals for all ESUs  
111 simultaneously, and 2) discrete individual assignment of each fish to population of origin.  
112 Our sample was intended to accurately reflect ESU-specific, spatial and temporal bycatch  
113 impacts over the course of each year in the fishery. That was the essential focus of  
114 NOAA's BiOp as related to Chinook salmon impacts (NMFS—WCR 2017).

115

116 [Table 1 near here]

117

### 118 ***Genotyping, genetic mixture modeling, and individual assignment***

119 DNA was extracted and purified by using Qiagen® DNeasy™ membrane capture.  
120 Purified DNA was amplified and genotyped for 13 internationally standardized  
121 microsatellite loci (see below). Microsatellite products were sized using an Applied  
122 Biosystems Incorporated (ABI) 3100 Genetic Analyzer. Genotypes were inferred from  
123 electropherograms by using ABI Genescan and Genotyper software. We used conditional  
124 maximum likelihood mixture modeling (CMLMM) to simultaneously estimate stock  
125 compositions and make individual assignments to population of origin (Rannala and  
126 Mountain 1997; ONCOR, Kalinowski et al. 2007), with bias correction (Anderson et al.  
127 2008). Population-level allocation was then aggregated by ESU reporting group. Genetic  
128 mixture analysis using ONCOR was replicated and confirmed with the R package 'rubias'  
129 (Moran and Anderson 2019). The two sets of genetic results from ONCOR, 1) modeled

130 proportions and 2) individual assignments, were used for the two different classes of  
131 statistical analysis, 1) Dirichlet regression (DR; Maier 2014) and 2) multinomial logistic  
132 regression (MLR; Hilbe 2009). CMLMM is taken to be the best possible estimate of ESU  
133 proportions in a given year. We use the term “observed” in reference to observed  
134 genotypes and observed latitudes that are compared to “predicted” ESU proportions from  
135 the regression models. We calculated credibility intervals for CMLMM proportions,  
136 however, we relied principally on cross validation of predictions and evaluation of  
137 accuracy with scale-dependent and -independent metrics (see below).

138

139 CMLMM depends on a baseline dataset of known-origin reference samples that is  
140 assumed to represent all potentially contributing populations. In this study, we used the  
141 most comprehensive Chinook Salmon baseline available, the internationally standardized,  
142 microsatellite dataset (i.e., common loci and consistent allele designations, Moran et al.  
143 2006) that was developed by the Genetic Analysis of Pacific Salmonids consortium  
144 (GAPS; Moran et al. 2005; Seeb et al. 2007). The GAPS baseline was designed for  
145 eastern Pacific fishery mixtures, primarily harvest, but the geographic coverage of  
146 potential source populations is complete from Southeast Alaska to Central Valley,  
147 California. The version of the baseline we used included more than 20,000 known-origin  
148 fish from 163 populations representing all ESUs and major Canadian and Alaskan stocks  
149 that contribute to these fisheries (Appendix 1). The GAPS baseline is thoroughly vetted  
150 by the salmon genetics community and has been widely used in studies of harvest  
151 impacts (Bellinger et al. 2015; Satterthwaite et al. 2015; Moran et al. 2018).

152

153 *Predictive regression models and cross validation*

154 Input data for our preliminary exploration included the ESU to which each fish  
155 assigned, collection year, ordinal day of the year, latitude (decimal degrees), fork length  
156 (cm), and fishing depth (m). Akaike information criterion (AIC) was used to evaluate  
157 different predictive models. Focusing on mean latitude of an annual bycatch sample, we  
158 compared two multinomial regression methods for predictive forecasting. DR was used to  
159 relate observed proportions for an annual sample of individuals relative to the mean  
160 latitudes over which those individuals were taken. MLR was also used to estimate an  
161 expected proportion for each ESU as a function of latitude but was based on individual  
162 fish rather than annual means. Compositional proportions are bounded by zero and one,  
163 and not normally distributed or homoscedastic. This class of proportions violates  
164 assumptions of linear regression and common parametric analyses such as t-tests and  
165 ANOVA, when used as a dependent variable. To evaluate the absolute and relative  
166 accuracy and precision of the two regression methods, we conducted sequential,  
167 independent, cross-validation analyses holding out each of 8 individual years, one at a  
168 time, as test datasets and using all remaining years as training data. We used a similar  
169 jackknife approach for both regression methods. In each case, we evaluated the accuracy  
170 of the prediction (based on the training data set) against the independent, cross-validation,  
171 test set (the “actual” or “observed” ESU proportions derived from observed genotypes).  
172 Central Valley Spring ESU only occurred in one test set (annual sample), so that ESU  
173 was omitted from the jackknife. To the extent possible, the jackknife is a sequential test  
174 of forecasting accuracy, “predicting” the composition of each annual sample as if it were  
175 a new observation.

176



177 To quantify accuracy and precision of our forecast predictions compared to  
178 observed genotypes, we used scale-dependent and scale-independent error metrics. For a  
179 scale-dependent metric we selected the widely used and easily understood mean squared  
180 error (MSE),

181

$$182 \quad \text{MSE} = 1/N \sum (y_t - f_t)^2.$$

183

184 Where  $N$  = number of tests,  $y_t$  = observed composition in the  $t^{\text{th}}$  test, and  $f_t$  = the  $t^{\text{th}}$   
185 forecast.

186

187 For a scale-independent metric we chose the less widely known mean arctangent  
188 absolute percentage error (MAAPE),

189

$$190 \quad \text{MAAPE} = 1/N \sum (\arctan( |y_t - f_t| / f_t )).$$

191

192 MAAPE can be interpreted intuitively as an absolute percentage error like the commonly  
193 used mean absolute percentage error (MAPE). However, MAAPE is less biased in greater  
194 penalties for positive errors than negative (Makridakis 1993). Moreover, the bounded  
195 range of the arctangent function ( $\lim_{x \rightarrow \infty} \tan^{-1} x = \pi / 2$ ) overcomes the MAPE's limitation  
196 of going to infinity as the observed value approaches zero (Kim and Kim 2016).

197

198 For context, we compared the accuracy of our modeled estimates with interannual  
199 variability between members of paired samples (observed data) that had similar mean  
200 latitudes. We selected pairs of annual samples that differed by less than 0.25 degrees in

201 mean latitude (2013 and 2014 at latitudes 43.8 and 43.5, respectively; and 2013 and 2015  
202 at latitudes 43.8 and 43.9). This interannual variability should represent the minimum  
203 error possible in a forecast estimate. We used the R statistical package (R Core Team  
204 2017) for most of our analyses and figures.

205

206

## RESULTS

207 NOAA fishery observers from the A-SHOP collected 9,862 individual tissue  
208 samples, which represented 41% of the total estimated Chinook Salmon bycatch between  
209 2008 and 2015 (Table 1). Samples were stratified by year, and a total of 4,498 fish were  
210 randomly subsampled for DNA extraction and analysis (19% of total bycatch).

211 Geographic distribution of individual tissue samples extended from Shelter Cove (41.43°),  
212 north to the Canadian border (48.48°); fishing depth 46 - 507 m (mean 246, SD 90.4);  
213 bottom depth 66 - 2,743 m (mean 427, SD 217.4), and fork length 24 - 113 cm (mean  
214 58.7, SD 11.9). A slight female bias was observed (0.54). Mean latitude values for each  
215 annual bycatch sample ranged over 4.4 degrees (43.5° - 47.9°). A general shift to the  
216 south was observed in fishing effort and bycatch beginning in 2011 (Table 1). Clearly,  
217 similar values for mean latitude might produce very different stock compositions if they  
218 have different distribution, e.g., non-normal. Through practical application and cross  
219 validation, our results demonstrate the sensitivity of our models to those violations of  
220 normality.

221

222

### *Genotyping and genetic mixture modeling*

223 Of 4,498 fish subsampled for genotyping, 96% met genotyping quality criteria. In  
224 addition to high genotyping success, high individual fish assignment probabilities were

225 also observed. About 78% of fish successfully genotyped met the assignment probability  
226 criterion of  $\geq 0.8$  (N = 3,360, 14% of total bycatch; see Moran et al. 2014 for sensitivity  
227 analysis). Modeled genetic estimates of overall proportions derived from all fish  
228 successfully genotyped (“observed”) showed that most of the Chinook Salmon bycatch in  
229 this period came from Upper Klamath-Trinity River and S. Oregon and N. California  
230 Coastal ESUs (Fig. 1). Those two ESUs accounted for more than 50% of all bycatch in  
231 the study period. Secondary contributors included the Oregon Coast and Puget Sound  
232 ESUs and Southern British Columbia (lower Fraser River, data not shown).

233

234 [Fig. 1 near here]

235           Managers often focus on fishery management areas. Differences in ESU  
236 composition between fishery management areas north and south of Cape Falcon (45.77°)  
237 showed the effect of latitude (See figs. 2 and 3 for area boundaries). The two southern  
238 ESUs—Upper Klamath-Trinity Rivers and S. Oregon/N. California—dominated bycatch  
239 south of Cape Falcon but dropped to only ~5% each to the north of Cape Falcon. The  
240 opposite was true of the northern ESU, Puget Sound, and Southern BC populations.  
241 Spatial variation was also reflected when comparing the annual samples, which were  
242 each taken at different mean latitudes and showed different ESU proportions (see  
243 Jackknife cross validation below).

244

245 [Fig. 2 near here]

246

### *Individual assignment*

247           Again, our analysis included two fundamentally different approaches, modeled  
248 proportions versus individual assignment. The ESU stock composition results above

249 describe fitted genetic models to all observed genotypic data simultaneously (Koljonen et  
250 al. 2005). At this point we shift to analyses based on individual fish assignment. First, we  
251 simply created a scatter plot of individually georeferenced fish, color coded by ESU, and  
252 overlaid on a map of the US West Coast (Fig. 3). That heuristic presentation also showed  
253 strong effects of latitude on ESU composition. No fish assigned to Sacramento Winter  
254 ESU, preventing inclusion of that ESU in the exploratory regression analysis described  
255 below.

256

257 [Fig. 3 near here]

258 Individual assignment was used to explore the ESU-specific predictive power of  
259 multiple sample attributes (e.g., latitude, depth, fork length, etc.). Previous simulations  
260 using the GAPS baseline showed that individual assignment with a threshold of  $\geq 0.8$  for  
261 inclusion, and regressing traits on ESUs is a robust and generally unbiased approach to  
262 inferring ESU-specific phenotypes (Moran et al. 2014). However, we recognize that  
263 individual assignment for compositional prediction raises issues of potential bias that go  
264 beyond the scope of this article. Nevertheless, our cross-validation approach subsumes  
265 those errors, allowing meaningful comparisons between disparate statistical methods.  
266 According to AIC evaluation of MLR models in particular, latitude was by far the most  
267 powerful single predictor of ESU origin (similar GAM results not shown). Other factors,  
268 most notably year, clearly explained additional variation, but Burnham and Anderson's  
269 (2004)  $\Delta$ AIC values for individual factors, relative to latitude alone, were compelling:  
270 year 1505, depth 1574, ordinal day 2271, and fork length 2544. More complex models  
271 gave lower AIC values, but were less suitable as predictors and as practical fishery  
272 management regulatory elements.

273

274           Plotting DR and MLR curves further illustrated the importance of latitude for  
275 most ESUs (Fig. 4). Consistent with the plot of fishery management areas (Fig. 2),  
276 northern ESUs were encountered primarily in the north, whereas southern ESUs were  
277 concentrated in southern and central coastal areas. Cape Falcon marked an abrupt  
278 transition in ESU composition of Chinook salmon bycatch.

279

280 [Fig. 4 near here]

281

### *Jackknife cross validation*

282           The estimated regression curves in Figure 4 can be compared with observed  
283 proportions in each annual sample (points in Fig. 4). However, the regression estimates  
284 include all data and are therefore not independent from the point observations in Figure 4  
285 (i.e., potentially presenting an overly optimistic interpretation of predictive power). By  
286 contrast, the jackknife, cross-validation analysis provided an independent observation for  
287 every ESU proportion in every year. Figure 5 compares observed ESU proportions for  
288 each year with independently derived estimates from the two regression methods and  
289 latitude alone. Figure 6 almost perfectly summarizes all individual years (Fig. 4) by  
290 averaging over jackknife iterations. Despite a major difference in the MLR estimate for  
291 Upper Klamath/Trinity Rivers, estimates for both regression models were close to one  
292 another and close to observation for most ESUs.

293

294 [Fig. 5 and Fig. 6 near here]

295

### *Annual replicates at similar latitude*

296 By chance, some annual samples had very similar mean latitudes. Consistent with  
297 latitude being more important than year in the AIC, similar ESU proportions were  
298 observed in those annual samples that had similar mean latitudes (i.e., 2013, 2014, and  
299 2015; Fig. 5). Comparison of variation between years with the accuracy of our forecast  
300 was mixed. Forecast predictions for large contributors showed substantially greater errors  
301 than variation observed between years at similar latitude (MSE = 0.0005 for DR and  
302 0.0008 for MLR compared with only 0.0001 for the annual replicates). However, the  
303 scale-independent metric suggested that prediction errors were quite similar to  
304 interannual variation (MAAPE = 0.670 and 0.564 for DR and MLR versus 0.572 for  
305 interannual replicates).

306

### 307 *Accuracy of DR vs MLR, overall and by ESU*

308 In predicting the ESU composition obtained from CMLMM in a given year, DR  
309 outperformed MLR for most ESUs that contributed more than 2.5%; however, the  
310 distribution of errors was complicated. For all contributors, MSE (most sensitive to large  
311 contributors) was 38% lower for DR than for MLR. Yet DR errors were more than three  
312 times as variable across years (CV = 56% for DR versus 21% for MLR). By contrast  
313 MAAPE (sensitive to small contributors) was 16% lower for MLR but nearly twice as  
314 variable (CV = 27% for MLR versus 14% for DR). So in each case, the more accurate  
315 regression method was less precise. A few patterns were evident in the accuracy and  
316 precision of individual ESU estimates. DR underpredicted Upper Klamath-Trinity Rivers  
317 ESU, in contrast to MLR that substantially overpredicted that ESU in nearly all years.  
318 Large MSE values for MLR were driven largely—but not entirely—by the extreme  
319 overprediction of Upper Klamath-Trinity Rivers ESU (Fig. 6; omitting Klamath/Trinity

320 only reduced MSE from 0.0008 to 0.0007, still greater than 0.0005 for DR, and much  
321 greater than 0.0001 observed between years at the same latitude). With the notable  
322 exception of S. Oregon and N. California Coastal ESU, which MLR estimated almost  
323 exactly, southern ESUs were overestimated by MLR, whereas northern ESUs were  
324 underestimated. DR underestimated all larger contributors (>5%), but consistently  
325 overestimated smaller contributors, e.g., Washington Coast, Upper Willamette River,  
326 Mid-Columbia River Spring, Upper Columbia River Spring Snake River Spring/Summer,  
327 Snake River Fall ESUs [all years except 2009], and Central British Columbia and Alaska).  
328 Extensive additional analyses did not show an obvious effect of omitting fish that failed  
329 to meet the 0.8 probability criterion for MLR.

330

331

## Discussion

332 We succeeded in developing useful predictive models for Chinook Salmon ESU  
333 stock composition estimates in a fishery management context. Latitudinal clines and  
334 stock-specific distributions observed here were generally consistent with distribution of  
335 CWT recoveries in harvest fisheries (Weitkamp 2010; Shelton et al. 2019; Shelton et al.  
336 2021). However, the current study, is the first we know of to describe pre-season  
337 prediction of ESU-specific impacts based simply on anticipated latitude of a proposed  
338 fishery. Given estimated bycatch numbers and latitudes (Matson and Erickson 2018),  
339 NOAA needed to parse total numbers by ESU to give predictions of actual fish counts,  
340 based on forecast proportions. These models were used previously in support of the 2017  
341 Chinook salmon ITS and BiOp for the West Coast Groundfish Fishery Management Plan  
342 (NMFS—WCR 2017). This paper is an extension of the ground truthing that went into  
343 the BiOp. Because management needed to estimate ESU-specific impacts at various

344 levels of take, our application required estimating proportions. Our approach was dictated  
345 by specific management needs, but the challenges of compositional forecasting and  
346 characterization of errors are ubiquitous in fields as disparate as ecological genetics and  
347 economic market research (Aitchison 1986). Even more broadly, the analysis of  
348 individuals versus aggregates is a fundamental statistical dichotomy.

349

### 350 *Broadly similar results between methods*

351 We evaluated the performance of two accepted multinomial regression models  
352 representing two different analytical approaches, one based on genetic mixture modeling  
353 and DR, and the other based on individual assignment and MLR. We observed broadly  
354 similar results, despite differences in both the treatment of genetic data and in the  
355 regression. Independent cross validation showed that both analysis methods gave  
356 surprisingly accurate estimates despite a range of potential challenges. Not least, that  
357 different distributions of bycatch, with different stock compositions, might have similar  
358 means, thus confounding our prediction.

359

360 On initial inspection, Dirichlet regression appeared more accurate than MLR, but  
361 neither method provided a clear advantage across both rare and abundant ESUs. For  
362 example, MLR consistently overestimated the abundant Upper Klamath-Trinity Rivers  
363 ESU, especially in 2008 and 2011, whereas DR was much more accurate. DR was clearly  
364 more accurate than MLR in estimating large contributors; however, DR consistently  
365 overestimated small contributors, such as Upper Willamette River, Snake River  
366 Spring/Summer, and Snake River Fall—all listed as Threatened under the US  
367 Endangered Species Act. MLR was much more accurate than DR in estimating those



368 small contributors at all latitudes and in nearly all years. Essentially all prediction errors  
369 for large contributors were greater than observed between members of paired annual  
370 samples at similar mean latitude—clearly room for improvement. However, for small  
371 contributors, prediction accuracy was extremely good. For example, 8 of 17 ESUs  
372 showed less variation between MLR prediction and observed ESU proportions in a given  
373 year than between years at similar latitude (6 of 17 for DR). In other words, prediction  
374 error with MLR was no larger than interannual variation for these small contributors.

375

376 Prediction accuracy is often critical for small contributors to mixed fisheries.  
377 Overprediction of sensitive or ESA-listed ESUs can lead to elevated concern, fishery  
378 restrictions, and needless forgone harvest. Moreover, a scale-independent metric like  
379 MAAPE could be considered a more appropriate measure of general forecasting accuracy  
380 than MSE. So, the recommended method depends on specific application and relative  
381 concern for abundant versus rare stocks. Harvest allocation might call for DR, whereas  
382 conservation might be better served by MLR. Managers are advised to examine both DR-  
383 and MLR-based take estimates and weigh the implications of specific inconsistencies.

384

### 385 *Comparison of Chinook Salmon stocks in bycatch versus directed harvest*

386 We noted interesting differences from stock compositions previously reported for  
387 harvest. Direct comparison is difficult, but it appeared anecdotally that the Bellinger et al.  
388 (2015) study of commercial troll observed substantially higher proportions of Central  
389 Valley Fall ESU and lower proportions of Klamath-Trinity ESU than the current study.  
390 Also, Columbia River populations were more abundant in troll than in bycatch (Fig. 5 e, f,

391 and g in Bellinger et al. 2015 compared to our Fig. 1). Similar results were seen in  
392 harvest studies (commercial and recreational fisheries) that sampled areas farther south  
393 (Winans et al. 2001; Satterthwaite et al. 2015).

394

395 With respect to latitude, the most direct available comparison between harvest and  
396 bycatch comes from the Washington commercial troll fishery (Moran et al. 2018). The  
397 mean latitude for all samples observed in that study between 2012 and 2015 was 47.4°,  
398 which was similar to the annual bycatch sample that we analyzed in 2009 (47.9°).

399 Despite that similarity in latitude, the observed stock compositions were quite different.

400 The relative abundance of Lower Columbia River and Upper Columbia River

401 Summer/Fall was much higher in Washington troll than in bycatch from similar latitude.

402 By contrast, proportions of Puget Sound and Southern British Columbia were much

403 lower in troll than in bycatch. A difference worth noting is that at-sea bycatch tends to be

404 unimodal in latitude within years (either north or south) but bimodal among years,

405 whereas Washington coastal troll is strongly bimodal every year (Moran et al. 2018).

406 There are also differences in depth and distance offshore. These anecdotal stock

407 composition differences among disparate studies are difficult to interpret without broader

408 spatial overlap and temporal replication. Eventually, however, the hope is that meta-

409 analyses among fisheries can help discriminate where fish are caught from exactly where

410 they are and how different populations use the marine environment in time and space.

411

412 ***Fishery-dependent focus: Opportunities and limitations***

413 Satterthwaite et al. (2014:128) pointed out that, for management purposes,

414 “variability in interactions with the fishery is more relevant than ecological distribution.”

415 The focus of the current study was not stock-specific, ecological distribution. Instead, we  
416 measured fishery impacts explicitly, and we limited most of our analysis to high-level  
417 spatial and temporal strata (i.e., coast-wide, annual). We chose both the scale and the  
418 compositional forecasting approach to provide fishery managers with a tool that required  
419 only simple inputs and would help meet obligations for predicting ESU impacts. In the  
420 context of depressed populations, it's worth recognizing the inherent challenge in  
421 estimating very small bycatch numbers. Some ESUs were rare or absent in our analysis.  
422 Fewer than 10 fish were observed for each of six ESUs, and no Sacramento Winter fish  
423 were observed. Despite small numbers of observations for some ESUs, the expected  
424 proportions for those rare ESUs are not independent and are partially informed by the  
425 proportions of all other ESUs, including abundant ESUs for which estimates are much  
426 more confident. Despite concerns about interannual variability, non-normal latitudinal  
427 distributions, and the utility of mean latitude, our cross validation showed that error in the  
428 MLR estimate was essentially indistinguishable from interannual variation between  
429 samples taken at the same latitude. Again, we point out that “errors” in our regression  
430 estimates are relative to “observation” that is also an estimate but is based on observed  
431 genotypes and is our best estimates of ESU proportions in a given year. We use the term  
432 observation to emphasize the distinction between estimation and prediction, an observed  
433 mixed fishery versus a compositional forecast.

434

435 Results of Weitkamp (2010) suggested stable Chinook Salmon stock distributions  
436 across years, despite different ocean conditions and relative stock abundance (but see  
437 Satterthwaite et al. 2012; Shelton et al. 2019; Shelton et al. 2021). Seasonal variation in  
438 bycatch composition is substantially dampened, relative to directed harvest, because of

439 the broad distribution of age classes in bycatch. For future genetic bycatch data, we will  
440 conduct a detailed exploration of stock-specific associations with oceanographic  
441 variables (sea-surface temperature, chlorophyll, etc.). Irrespective of spatial changes in  
442 fishing activity, if Chinook Salmon change their distribution or relative abundance in  
443 response to climate change, will the curves remain the same, shift uniformly north (or  
444 south), or will shapes and relative relationships of the curves change fundamentally, as  
445 predicted by Shelton et al (2021)? Climate effects on these latitudinal distributions could  
446 go beyond Chinook ESU impacts and conservation, to the extent ESA-listed southern  
447 resident killer whales target preferred Chinook salmon stocks (Hanson et al. 2010).

448

449         These questions are important, as the fishing industry becomes increasingly  
450 sophisticated in their requests for data on salmon distribution. Not only do fishing fleets  
451 want to avoid Chinook Salmon bycatch, they especially want to avoid protected or  
452 sensitive ESUs like Puget Sound, Lower Columbia River, Upper Klamath-Trinity Rivers,  
453 California Coast, and Central Valley Fall. Our figures 3 and 4 summarize what we know  
454 about where these ESUs are most likely to be caught. An obvious measure to avoid  
455 particular ESUs is to avoid nearby latitudes. The trouble is, moving north to avoid the  
456 threatened California Coast ESU, for example, would likely shift impacts to Puget Sound  
457 and Lower Columbia River, also listed as threatened under the US ESA. Moreover,  
458 moving fishing pressure north or south has a big effect on ESUs like Upper Klamath-  
459 Trinity Rivers or Puget Sound that have steep latitudinal clines, but less effect on ESUs  
460 like California Coast that have broader, flatter distributions. Despite that practical  
461 limitation to active avoidance of sensitive stocks, our regression models successfully

462 address thorny statistical challenges and offer practical tools that are useful in evaluating  
463 ESU-specific impacts under different fishery management scenarios.

464

465

## ACKNOWLEDGEMENTS

466 We especially thank Andre Punt and William Satterthwaite of the PFMC's Scientific and  
467 Statistical Committee. They questioned our early compositional analyses and started us  
468 down a very interesting and rewarding path. We thank Jeffrey Hard, Eric Ward, Jim  
469 Hastie, and Owen Hamel for helping develop the theoretical framework. NOAA's A-  
470 SHOP and Cassandra Donovan provided outstanding training, sample collection, and data  
471 preparation. NWFSC laboratory staff Delia Patterson, Eric Iwamoto, Eric LaHood, and  
472 David Kuligowski conducted sample processing and genotyping. Many reviewers  
473 improved early drafts, including Michael Ford, Owen Hamel, Jeffrey Hard, Garrett  
474 McKinney, William Satterthwaite, Eric Ward, Laurie Weitkamp, and two anonymous  
475 reviewers. Reference to trade names is for information only, not endorsement by the U.S.  
476 Government.

477

478

## REFERENCES

479 Aitchison, J. 1986. The statistical analysis of compositional data. Chapman and Hall,  
480 London, 416 p. [doi.org/10.1007/978-94-009-4109-0](https://doi.org/10.1007/978-94-009-4109-0)

481

482 Anderson, E. C. R. S. Waples, and S. T. Kalinowski. 2008. An improved method for  
483 predicting the accuracy of genetic stock identification. *Canadian Journal of Fisheries and*  
484 *Aquatic Sciences* 65:1475-1486.

485

486 Bellinger, M. R., M. A. Banks, S. J. Bates, E. D. Crandall, J. C. Garza, G. Sylvia, and P.  
487 W. Lawson. 2015. Geo-referenced, abundance calibrated ocean distribution of Chinook  
488 Salmon (*Oncorhynchus tshawytscha*) stocks across the West Coast of North America.  
489 PLOS (Public Library of Science) ONE [online serial] 10(7):e0131276.  
490  
491 Burnham, K. P. and D. R. Anderson. 2002. Model selection and multimodel inference: A  
492 practical information-theoretic approach. New York, NY: Springer.  
493  
494 Easley, J. 2001. History of trawling off the Pacific Coast. In: Microbehavior and  
495 Macroresults: Proceedings of the Tenth Biennial Conference of the International Institute  
496 of Fisheries Economics and Trade, July 10-14, 2000, Corvallis, Oregon, USA. Edited by  
497 Richard S. Johnston and compiled by Ann L. Shriver. International Institute of Fisheries  
498 Economics and Trade (IIFET), Corvallis, OR, 2001. CD ROM. ISBN: 0-9763432-2-3  
499  
500 Hamel, O. S., P. H. Ressler, R. E. Thomas, D. A. Waldeck, A. C. Hicks, J. A. Holmes, G.  
501 W. Fleischer. 2015. Biology, fisheries, assessment and management of Pacific hake  
502 (*Merluccius productus*). In Arancibia, H. (Ed.) Hake: Biology, Fisheries and Markets  
503 [2nd Edition]. Wiley-Blackwell Science.  
504  
505 Hanson, M. B., R.W. Baird, J. K. B. Ford, J. Hempelmann-Halos, D. M. Van Doornik, J.  
506 R. Candy, C. K. Emmon<sup>1</sup>, G. S. Schorr, B. Gisborne, K. L. Ayres, S. K. Wasser, K. C.  
507 Balcomb, K. Balcomb-Bartok, J. G. Sneva, and M. J. Ford. 2010. Species and stock  
508 identification of prey consumed by endangered southern resident killer whales in their  
509 summer range. 11:69-82.

510

511 Hilbe, J. M. 2009. Logistic regression models. Chapman and Hall/CRC Press.

512

513 Kalinowski, S. T., K. R. Manlove, and M. L. Taper. 2007. ONCOR A computer program  
514 for Genetic Stock Identification. Department of Ecology, Montana State University,  
515 Bozeman MT 59717. Available: [montana.edu/kalinowski](http://montana.edu/kalinowski).

516

517 Kim, S. and H. Kim. 2016. A new metric of absolute percentage error for intermittent  
518 demand forecasts. *International Journal of Forecasting* 32:669-679.

519

520 Koljonen, M.-L., J. J. Pella, and M. Masuda. 2005. Classical individual assignments  
521 versus mixture modeling to estimate stock proportions in Atlantic salmon (*Salmo salar*)  
522 catches from DNA microsatellite data. *Canadian Journal of Fisheries and Aquatic  
523 Sciences* 62:2143-2158.

524

525 Maier, M. J. 2014. DirichletReg: Dirichlet regression for compositional data in R.  
526 Research Report Series/Department of Statistics and Mathematics, 125. WU Vienna  
527 University of Economics and Business, Vienna. Available: [epub.wu.ac.at/4077/](http://epub.wu.ac.at/4077/)

528

529 Makridakis, S. 1993. Accuracy measures: theoretical and practical concerns. *International  
530 Journal of Forecasting*. 9:527-529.

531

532 Matson, S. E. and D. Erickson. 2018. Analysis of West Coast Groundfish Fisheries for  
533 the 2017 Salmon ESA Biological Opinion, NOAA. NOAA Technical Memorandum  
534 NMFS-OSF-X, 113 p.  
535

536 Moran, B. M. and E. C. Anderson. 2019. Bayesian inference from the conditional genetic  
537 stock identification model. *Canadian Journal of Fisheries and Aquatic Sciences* 76:551-  
538 560.  
539

540 Moran, P., M. Banks, T. Beacham, C. Garza, S. Narum, M. Powell, M. Campbell, L.  
541 Seeb, R. Wilmot, S. Young, B. Ardren, and J. Wenburg. 2005. Interlaboratory  
542 standardization of coast-wide Chinook salmon genetic data for international harvest  
543 management. Progress report from the Genetic Analysis of Pacific Salmonids (GAPS)  
544 consortium to the Chinook Technical Committee of the Pacific Salmon Commission,  
545 FY2004, FY2005, 44 p. Available:  
546 [nwfsc.noaa.gov/research/divisions/cb/documents/gaps\\_year2\\_final.pdf](http://nwfsc.noaa.gov/research/divisions/cb/documents/gaps_year2_final.pdf)  
547

548 Moran, P., D. J. Teel, E. S. LaHood, J. Drake, and S. Kalinowski. 2006. Standardising  
549 multi-laboratory microsatellite data in Pacific salmon: an historical view of the future.  
550 *Ecology of Freshwater Fish*. 15:597-605.  
551

552 Moran, P., D. J. Teel, M. A. Banks, T. D. Beacham, M. R. Bellinger, S. M. Blankenship,  
553 J. R. Candy, J. C. Garza, J. E. Hess, S. R. Narum, L. W. Seeb, W. D. Templin, C. G.  
554 Wallace, and C. T. Smith. 2013. Divergent life-history races do not represent Chinook  
555 salmon coast-wide: the importance of scale in Quaternary biogeography. *Canadian*



556 Journal of Fisheries and Aquatic Sciences 70:415–435.  
557  
558 Moran, P., J. B. Bromaghin, and M. Masuda. 2014. Use of genetic data to infer  
559 population-specific ecological and phenotypic traits from mixed aggregations. PLoS  
560 ONE 9(6):e98470.  
561  
562 Moran, P., J. Dazey, L. LaVoy, and S. Young. 2018. Genetic mixture analysis supports  
563 re-calibration of the Fishery Regulation Assessment Model. Fisheries 43:83-97.  
564  
565 NMFS—WCR (National Marine Fisheries Service, West Coast Region). 2017.  
566 Endangered Species Act (ESA) Section 7(a)(2) Biological Opinion. Reinitiation of  
567 Section 7 Consultation regarding the Pacific Fisheries Management Council's Groundfish  
568 Fishery Management Plan, NMFS Consultation Number: F/WCR-2017-7552. Available  
569 [westcoast.fisheries.noaa.gov/publications/fishery\\_management/groundfish/s7-](http://westcoast.fisheries.noaa.gov/publications/fishery_management/groundfish/s7-groundfish-biop-121117.pdf)  
570 [groundfish-biop-121117.pdf](http://westcoast.fisheries.noaa.gov/publications/fishery_management/groundfish/s7-groundfish-biop-121117.pdf)  
571  
572 NOAA (National Oceanic and Atmospheric Administration). 2019. FishWatch U.S.  
573 Seafood Facts. Available: [fishwatch.gov/profiles/pacific-whiting](http://fishwatch.gov/profiles/pacific-whiting) (accessed 5 June  
574 2019).  
575  
576 NWFSC (Northwest Fisheries Science Center,). 2021. At-Sea Hake Observer Program  
577 Sampling Manual. Fishery Resource Analysis and Monitoring Division. Available:  
578 [https://media.fisheries.noaa.gov/2021-04/A-SHOP-Manual%202021-508-compliant-](https://media.fisheries.noaa.gov/2021-04/A-SHOP-Manual%202021-508-compliant-updated.pdf?null)  
579 [updated.pdf?null](https://media.fisheries.noaa.gov/2021-04/A-SHOP-Manual%202021-508-compliant-updated.pdf?null).

580

581 PSC (Pacific Salmon Commission). 2020. Treaty between the Government of Canada

582 and the Government of the United States of America concerning Pacific salmon.

583 Prepared by the Pacific Salmon Commission, January 2020. Available:

584 <https://www.psc.org/download/45/miscellaneous/2337/pacific-salmon-treaty.pdf>.

585

586 Quirollo, L. F., V. G. Wespestad, and M. W. Dorn. 2001. Pacific hake, in California's

587 living marine resources: A status report. California Department of Fish and Game. Pages

588 393 – 397. Available: [nrm.dfg.ca.gov/FileHandler.ashx?DocumentID=34265&inline](http://nrm.dfg.ca.gov/FileHandler.ashx?DocumentID=34265&inline).

589

590 R Core Team. 2017. R: A language and environment for statistical computing. R

591 Foundation for Statistical Computing, Vienna, Austria. Available: [R-project.org/](http://R-project.org/).

592

593 Rannala, B. and J. L. Mountain. 1997. Detecting immigration by using multilocus

594 genotypes. Proceedings of the National Academy of Sciences USA. 94:9197–9201.

595

596 Riddell, B. E., R. D. Brodeur, A. V. Bugaev, P. Moran, J. M. Murphy, J. A. Orsi, M.

597 Trudel, L. A. Weitkamp, B. K. Wells, and A. C. Wertheimer. 2018. Ocean ecology of

598 Chinook Salmon. Pages 555 – 696 in: R. Beamish (ed.) Ocean ecology of Pacific salmon

599 and trout. American Fisheries Society. 1147 p.

600

601 Satterthwaite, W.H., Michael Steven Mohr, Michael Robert O'Farrell, and Brian Kenneth

602 Wells. 2012. A Bayesian hierarchical model of size-at-age in ocean-harvested stocks —

603 quantifying effects of climate and temporal variability. *Canadian Journal of Fisheries and*  
604 *Aquatic Sciences*. 69:942-954.

605

606 Satterthwaite, W. H., M. S. Mohr, M. R. O'Farrell, E. C. Anderson, M. A. Banks, S. J.  
607 Bates, M. R. Bellinger, L. A. Borgerson, E. D. Crandall, J. C. Garza, B. J. Kormos, P. W.  
608 Lawson, and M. L. Palmer-Zwahlen. 2014. Use of stock identification data for  
609 comparison of the ocean spatial distribution, size at age, and fishery exposure of an  
610 untagged stock and its indicator: California coastal versus Klamath River Chinook  
611 Salmon. *Transactions of the American Fisheries Society* 143:117–133.

612

613 Satterthwaite, W. H., J. Ciancio, E. Crandall, M. L. Palmer-Zwahlen, A. M. Grover, M.  
614 R. O'Farrell, E. C. Anderson, M. S. Mohra, J.C. Garza. 2015. Stock composition and  
615 ocean spatial distribution inference from California recreational Chinook salmon fisheries  
616 using genetic stock identification. *Fisheries Research* 170:166–178.

617

618 Seeb, L.W., A. Antonovich, M.A. Banks, T.D. Beacham, M.R. Bellinger, S.M.  
619 Blankenship, M. Campbell, N. A. Decovich, J. C. Garza, C. M. Guthrie III, T.A.  
620 Lundrigen, P. Moran, S.R. Narum, J.J. Stephenson, K J. Supernault, D.J. Teel, W.D.  
621 Templin, J.K. Wenburg, S.F. Young, and C.T. Smith. 2007. Development of a  
622 standardized DNA database for Chinook salmon. *Fisheries* 32:540-552.

623

624 Shelton, A.O., W.H. Satterthwaite, E.J. Ward, B.E. Feist, and B. Burke. 2019. Using  
625 hierarchical models to estimate stock-specific and seasonal variation in ocean distribution,  
626 survivorship, and aggregate abundance of fall run Chinook salmon. *Canadian Journal of*

627 Aquatic Sciences. 76:95-108.

628

629 Shelton, A.O., G.H. Sullaway, E.J. Ward, B.E. Feist, K.A. Somers, V.J. Tuttle, J.T.

630 Watson, and W.H. Satterthwaite. 2021. Redistribution of salmon populations in the

631 northeast Pacific ocean in response to climate. *Fish and Fisheries* 22:503-517.

632

633 Somers, K. A., M. A. Bellman, J. E. Jannot, Y. W. Lee, J. McVeigh, V. Tuttle. 2015.

634 Observed and estimated total bycatch of salmon in the 2002-2013 U.S. West Coast

635 fisheries. West Coast Groundfish Observer Program. National Marine Fisheries Service,

636 NWFSC, 2725 Montlake Blvd E., Seattle, WA 98112. Available:

637 [nwfsc.noaa.gov/research/divisions/fram/observation/pdf/Salmon\\_Bycatch\\_Report\\_2002-](https://www.nwfsc.noaa.gov/research/divisions/fram/observation/pdf/Salmon_Bycatch_Report_2002-2013.pdf)

638 [2013.pdf](https://www.nwfsc.noaa.gov/research/divisions/fram/observation/pdf/Salmon_Bycatch_Report_2002-2013.pdf)

639

640 Weitkamp, L. A. 2010. Marine distribution of Chinook Salmon (*Oncorhynchus*

641 *tshawytscha*) from the West Coast of North America determined by coded wire tag

642 recoveries. *Transactions of the American Fisheries Society* 139:147–170.

643

644 Winans, G. A., D. Viele, A. Grover, M. Palmer-Zwahlen, D. Teel, and D. Van Doornik.

645 2001. An update of genetic stock identification of Chinook Salmon in the Pacific

646 Northwest: Test fisheries in California. *Reviews in Fisheries Science*, 9:213–237.

647 Table 1. Chinook Salmon bycatch in the at-sea sectors of the US West Coast Pacific  
648 Hake fishery (where >0.8 is the number of individual fish that met that assignment  
649 probability threshold, and Mean latitude is derived from all fish genotyped)

| <b>Year</b>  | <b>Bycatch<sup>1</sup></b> | <b>Collected</b> | <b>Subsampled</b>  | <b>Genotyped</b> | <b>&gt;0.8</b> | <b>Mean lat.</b> | <b>Accession #<sup>2</sup></b> |
|--------------|----------------------------|------------------|--------------------|------------------|----------------|------------------|--------------------------------|
| <b>2008</b>  | 875                        | 271              | 271                | 258              | 178            | 46.32            | 34801                          |
| <b>2009</b>  | 1,142                      | 403              | 403                | 390              | 326            | 47.89            | 34592                          |
| <b>2010</b>  | 1,364                      | 680              | 680                | 664              | 548            | 46.89            | 34927                          |
| <b>2011</b>  | 4,360                      | 1,837            | 1,835 <sup>3</sup> | 1,693            | 1,284          | 44.77            | 90517                          |
| <b>2012</b>  | 4,209                      | 2,013            | 288                | 288              | 215            | 44.43            | 90598                          |
| <b>2013</b>  | 3,739                      | 1,542            | 288                | 285              | 218            | 43.78            | 90601                          |
| <b>2014</b>  | 6,695                      | 2,368            | 384                | 381              | 295            | 43.54            | 90627                          |
| <b>2015</b>  | 1,806                      | 748              | 349                | 345              | 296            | 43.91            | 90654                          |
| <b>Total</b> | 24,190                     | 9,862            | 4,498              | 4,304            | 3,360          | 45.21            |                                |

<sup>1</sup>Estimated total Chinook bycatch

[nwfsc.noaa.gov/research/divisions/fram/observation/xls/SalmonBycatch\\_Expanded\\_2002-2015.xlsx](http://nwfsc.noaa.gov/research/divisions/fram/observation/xls/SalmonBycatch_Expanded_2002-2015.xlsx)

<sup>2</sup>NWFSC Conservation Biology Division Tissue Archive

<sup>3</sup>Essentially all collected samples were selected for genotyping in 2012

650

651

652 **APPENDIX**

653 Reference populations and reporting group structure for genetic mixture analysis based  
654 on Evolutionarily Significant Units (J. Myers, pers. comm. January 2016). Populations  
655 modified from Seeb et al. (2007). Status: E = Endangered, T = Threatened, C = Candidate,  
656 NW = Not Warranted, N/A = Not Applicable, stock aggregates that are not ESUs, which  
657 are only defined for the conterminous, US West Coast states. Carson Hatchery is a  
658 mixed-origin broodstock that is not listed under the ESA.

| Genetic baseline population | ESU reporting group                 | Status |
|-----------------------------|-------------------------------------|--------|
| Sacramento Hatchery         | Sacramento Winter                   | E      |
| Butte Creek sp              | Central Valley Spring               | T      |
| Deer Creek sp               | Central Valley Spring               | T      |
| Mill Creek sp               | Central Valley Spring               | T      |
| Feather Hatchery sp         | Central Valley Fall                 | C      |
| Feather Hatchery fa         | Central Valley Fall                 | C      |
| Butte Creek fa              | Central Valley Fall                 | C      |
| Stanislaus River            | Central Valley Fall                 | C      |
| Battle Creek                | Central Valley Fall                 | C      |
| Russian River               | California Coastal                  | T      |
| Eel River                   | California Coastal                  | T      |
| Trinity Hatchery fa         | Upper Klamath-Trinity Rivers        | NW     |
| TrinityHatchery sp          | Upper Klamath-Trinity Rivers        | NW     |
| Klamath River fa            | Upper Klamath-Trinity Rivers        | NW     |
| Chetco River                | S. Oregon and N. California Coastal | NW     |
| Applegate Creek             | S. Oregon and N. California Coastal | NW     |
| Cole Rivers Hatchery        | S. Oregon and N. California Coastal | NW     |

| Genetic baseline population | ESU reporting group  | Status |
|-----------------------------|----------------------|--------|
| Elk Hatchery                | Oregon Coast         | NW     |
| Sixes River                 | Oregon Coast         | NW     |
| Coquille River              | Oregon Coast         | NW     |
| Coos Hatchery               | Oregon Coast         | NW     |
| S Umpqua Hatchery           | Oregon Coast         | NW     |
| Umpqua Hatchery             | Oregon Coast         | NW     |
| Siuslaw River               | Oregon Coast         | NW     |
| Alsea River                 | Oregon Coast         | NW     |
| Yaquina River               | Oregon Coast         | NW     |
| Siletz River                | Oregon Coast         | NW     |
| Salmon River fa             | Oregon Coast         | NW     |
| Nestucca Hatchery           | Oregon Coast         | NW     |
| Trask River                 | Oregon Coast         | NW     |
| Wilson River                | Oregon Coast         | NW     |
| Kilchis River               | Oregon Coast         | NW     |
| Nehalem River               | Oregon Coast         | NW     |
| Necanicum Hatchery          | Oregon Coast         | NW     |
| Forks Creek Hatchery        | Washington Coast     | NW     |
| Humptulips Hatchery         | Washington Coast     | NW     |
| Queets River                | Washington Coast     | NW     |
| Hoh River                   | Washington Coast     | NW     |
| Sol Duc Hatchery            | Washington Coast     | NW     |
| Makah Hatchery              | Washington Coast     | NW     |
| Lewis Hatchery sp           | Lower Columbia River | T      |

| Genetic baseline population | ESU reporting group              | Status |
|-----------------------------|----------------------------------|--------|
| Kalama Hatchery sp          | Lower Columbia River             | T      |
| Cowlitz Hatchery sp         | Lower Columbia River             | T      |
| Cowlitz Hatchery fa         | Lower Columbia River             | T      |
| Sandy River                 | Lower Columbia River             | T      |
| Lewis River fa              | Lower Columbia River             | T      |
| Spring Creek Hatchery       | Lower Columbia River             | T      |
| McKenzie Hatchery           | Upper Willamette River           | T      |
| N Santiam Hatchery          | Upper Willamette River           | T      |
| Warm Springs Hatchery       | Mid-Columbia River Spring        | NW     |
| John Day River              | Mid-Columbia River Spring        | NW     |
| U Yakima Hatchery           | Mid-Columbia River Spring        | NW     |
| Wenatchee River sp          | Upper Columbia River Spring      | E      |
| Wenatchee Hatchery sp       | Upper Columbia River Spring      | E      |
| Carson Hatchery             | Upper Columbia River Spring      | N/A    |
| U Deschutes River           | Deschutes River Summer/Fall      | NW     |
| L Deschutes River           | Deschutes River Summer/Fall      | NW     |
| Hanford Reach               | Upper Columbia River Summer/Fall | NW     |
| Wenatchee River su/fa       | Upper Columbia River Summer/Fall | NW     |
| Wells Hatchery              | Upper Columbia River Summer/Fall | NW     |
| Methow River                | Upper Columbia River Summer/Fall | NW     |
| Lyons Ferry Hatchery        | Snake River Fall                 | T      |
| EF Salmon River             | Snake River Spring/Summer        | T      |
| WF Yankee Fork              | Snake River Spring/Summer        | T      |
| Secesh River                | Snake River Spring/Summer        | T      |



| Genetic baseline population | ESU reporting group       | Status |
|-----------------------------|---------------------------|--------|
| Rapid River Hatchery        | Snake River Spring/Summer | T      |
| Minam River                 | Snake River Spring/Summer | T      |
| Imnaha River                | Snake River Spring/Summer | T      |
| Newsome Creek               | Snake River Spring/Summer | T      |
| Tucannon Hatchery           | Snake River Spring/Summer | T      |
| Tucannon River              | Snake River Spring/Summer | T      |
| Clear Creek Hatchery        | Puget Sound               | T      |
| Voights Hatchery            | Puget Sound               | T      |
| S Prairie Creek             | Puget Sound               | T      |
| Soos Hatchery               | Puget Sound               | T      |
| George Adams Hatchery       | Puget Sound               | T      |
| Hamma Hamma River           | Puget Sound               | T      |
| Snoqualmie River            | Puget Sound               | T      |
| Samish Hatchery             | Puget Sound               | T      |
| Elwha Hatchery              | Puget Sound               | T      |
| Elwha River                 | Puget Sound               | T      |
| Dungeness River             | Puget Sound               | T      |
| NF Nooksack Hatchery        | Puget Sound               | T      |
| White Hatchery              | Puget Sound               | T      |
| Hatcheryupp Sp Hatchery     | Puget Sound               | T      |
| Skykomish River             | Puget Sound               | T      |
| Wallace Hatchery            | Puget Sound               | T      |
| NF Stillaguam Hatchery      | Puget Sound               | T      |
| Skagit River                | Puget Sound               | T      |

| Genetic baseline population | ESU reporting group | Status |
|-----------------------------|---------------------|--------|
| U Sauk River                | Puget Sound         | T      |
| Suiattle River              | Puget Sound         | T      |
| L Sauk River                | Puget Sound         | T      |
| Marblemount Hatchery sp     | Puget Sound         | T      |
| Marblemount Hatchery su     | Puget Sound         | T      |
| U Cascade River             | Puget Sound         | T      |
| U Skagit River              | Puget Sound         | T      |
| W Chilliwack Hatchery       | Southern BC         | N/A    |
| Maria Slough                | Southern BC         | N/A    |
| Birkenhead Hatchery         | Southern BC         | N/A    |
| M Shuswap Hatchery          | Southern BC         | N/A    |
| L Thomson River             | Southern BC         | N/A    |
| L Adams Hatchery            | Southern BC         | N/A    |
| Clearwater River            | Southern BC         | N/A    |
| Riveraft River              | Southern BC         | N/A    |
| Spilus Hatchery             | Southern BC         | N/A    |
| Nicola Hatchery             | Southern BC         | N/A    |
| Louis Creek                 | Southern BC         | N/A    |
| Deadman Hatchery            | Southern BC         | N/A    |
| U Chilcotin River           | Southern BC         | N/A    |
| Chilko River                | Southern BC         | N/A    |
| Quesnel River               | Southern BC         | N/A    |
| Nechako River               | Southern BC         | N/A    |
| Stuart River                | Southern BC         | N/A    |

| Genetic baseline population | ESU reporting group | Status |
|-----------------------------|---------------------|--------|
| Swift River                 | Southern BC         | N/A    |
| Morkill River               | Southern BC         | N/A    |
| Salmon River sp             | Southern BC         | N/A    |
| Cowichan Hatchery           | Southern BC         | N/A    |
| Nanaimo Hatchery fa         | Southern BC         | N/A    |
| Big Qualicum Hatchery       | Southern BC         | N/A    |
| Puntledge Hatchery fa       | Southern BC         | N/A    |
| Quinsam Hatchery            | Southern BC         | N/A    |
| Nitinat Hatchery            | Southern BC         | N/A    |
| Sarita Hatchery             | Southern BC         | N/A    |
| Tranquil River              | Southern BC         | N/A    |
| Robertson Hatchery          | Southern BC         | N/A    |
| Conuma Hatchery             | Southern BC         | N/A    |
| Tahsis River                | Southern BC         | N/A    |
| Marble Hatchery             | Southern BC         | N/A    |
| Porteau Cove Hatchery       | Southern BC         | N/A    |
| Klinaklini River            | Southern BC         | N/A    |
| Wannock Hatchery            | Central BC-AK       | N/A    |
| Atnarko Hatchery            | Central BC-AK       | N/A    |
| Kitimat Hatchery            | Central BC-AK       | N/A    |
| Ecstall River               | Central BC-AK       | N/A    |
| L Kalum River               | Central BC-AK       | N/A    |
| Bulkley River               | Central BC-AK       | N/A    |
| Sustut River                | Central BC-AK       | N/A    |

| Genetic baseline population | ESU reporting group | Status |
|-----------------------------|---------------------|--------|
| Kincolith River             | Central BC-AK       | N/A    |
| Kwinageese River            | Central BC-AK       | N/A    |
| Damdochax River             | Central BC-AK       | N/A    |
| Owegee River                | Central BC-AK       | N/A    |
| L Tahltan River             | Central BC-AK       | N/A    |
| Nakina River                | Central BC-AK       | N/A    |
| Kowatua Creek               | Central BC-AK       | N/A    |
| Tatsatua Creek              | Central BC-AK       | N/A    |
| U Nahlin River              | Central BC-AK       | N/A    |
| Chickamin/White Hatchery    | Central BC-AK       | N/A    |
| Chickamin Hatchery          | Central BC-AK       | N/A    |
| Chickamin River             | Central BC-AK       | N/A    |
| Keta River                  | Central BC-AK       | N/A    |
| King Creek                  | Central BC-AK       | N/A    |
| Clear Creek                 | Central BC-AK       | N/A    |
| Creekipple Creek            | Central BC-AK       | N/A    |
| Andrew Creek                | Central BC-AK       | N/A    |
| Andrew/Mac Hatchery         | Central BC-AK       | N/A    |
| Andrew/Med Hatchery         | Central BC-AK       | N/A    |
| Andrew/Cry Hatchery         | Central BC-AK       | N/A    |
| King Salmon River           | Central BC-AK       | N/A    |
| Big Boulder Creek           | Central BC-AK       | N/A    |
| Tahini River                | Central BC-AK       | N/A    |
| Tahini/Mac Hatchery         | Central BC-AK       | N/A    |

| Genetic baseline population | ESU reporting group | Status |
|-----------------------------|---------------------|--------|
| Klukshu River               | Central BC-AK       | N/A    |
| Situk River                 | Central BC-AK       | N/A    |

659 <sup>1</sup>Feather River spring run brood stock was extensively hybridized with fall run in that  
660 program and the two are now genetically indistinguishable.

661 <sup>2</sup>Brood stock from Cole M. Rivers Hatchery on the Rogue River in Southern Oregon is  
662 currently propagated and released in Young's Bay at the mouth of the Columbia River.

663 **Figure captions**

664 Figure 1. Overall Chinook Salmon ESU proportions observed in at-sea Pacific Hake  
665 trawl fisheries for all years combined 2008 - 2015. ESUs and two stock aggregates are  
666 ordered from south to north.

667 Figure 2. Chinook Salmon ESU proportions, stratified by fishery management area,  
668 ordered from south to north. Area 1: North of Cape Falcon, Oregon ( $45.77^\circ$ ); Area 2:  
669 Cape Falcon, Oregon to Cape Blanco, Oregon ( $42.75^\circ$  to  $45.77^\circ$ ); Area 3: Cape Blanco,  
670 Oregon to Cape Mendocino, California ( $40.16^\circ$  to  $42.75^\circ$ ). See Figure 3 for area  
671 boundaries.

672 Figure 3. Individual Chinook Salmon taken in bycatch, color coded by most likely ESU  
673 of origin, from red in the south to blue in the north. Fishery management area boundaries  
674 are shown as red lines with associated latitudes (see Fig. 2 for area descriptions).

675 Figure 4. Dirichlet regression (solid) and multinomial logistic regression (dashed) with  
676 observed proportions (summing to one over all four panels) and mean latitudes of annual  
677 samples (points). Data ranges differ because DR is based on mean latitudes, whereas  
678 MLR is fitted to individual fish, their observed latitude, and the ESU to which they were  
679 assigned. Regional divisions simply facilitate interpretation.

680 Figure 5. Selected realizations of the jackknife analysis are shown in each panel, where  
681 one entire annual sample (identified in title) was held out as a cross-validation test set  
682 (Obs). The remaining years were used as a training set to estimate ESU proportions given  
683 the observed latitude. Those proportions shifted beginning in 2011 and from 2012 to

684 2015 northern ESUs nearly disappeared. Note that observed proportions were similar  
685 between 2013 and 2015, when mean latitudes were also similar ( $\sim 43.8^\circ$ , Table 1).

686 Figure 6. Model cross validation, summarized from Figure 5, comparing observed ESU  
687 proportions (Obs) with values predicted from Dirichlet regression (DR) and multinomial  
688 logistic regression (MLR), independent of observation.

689

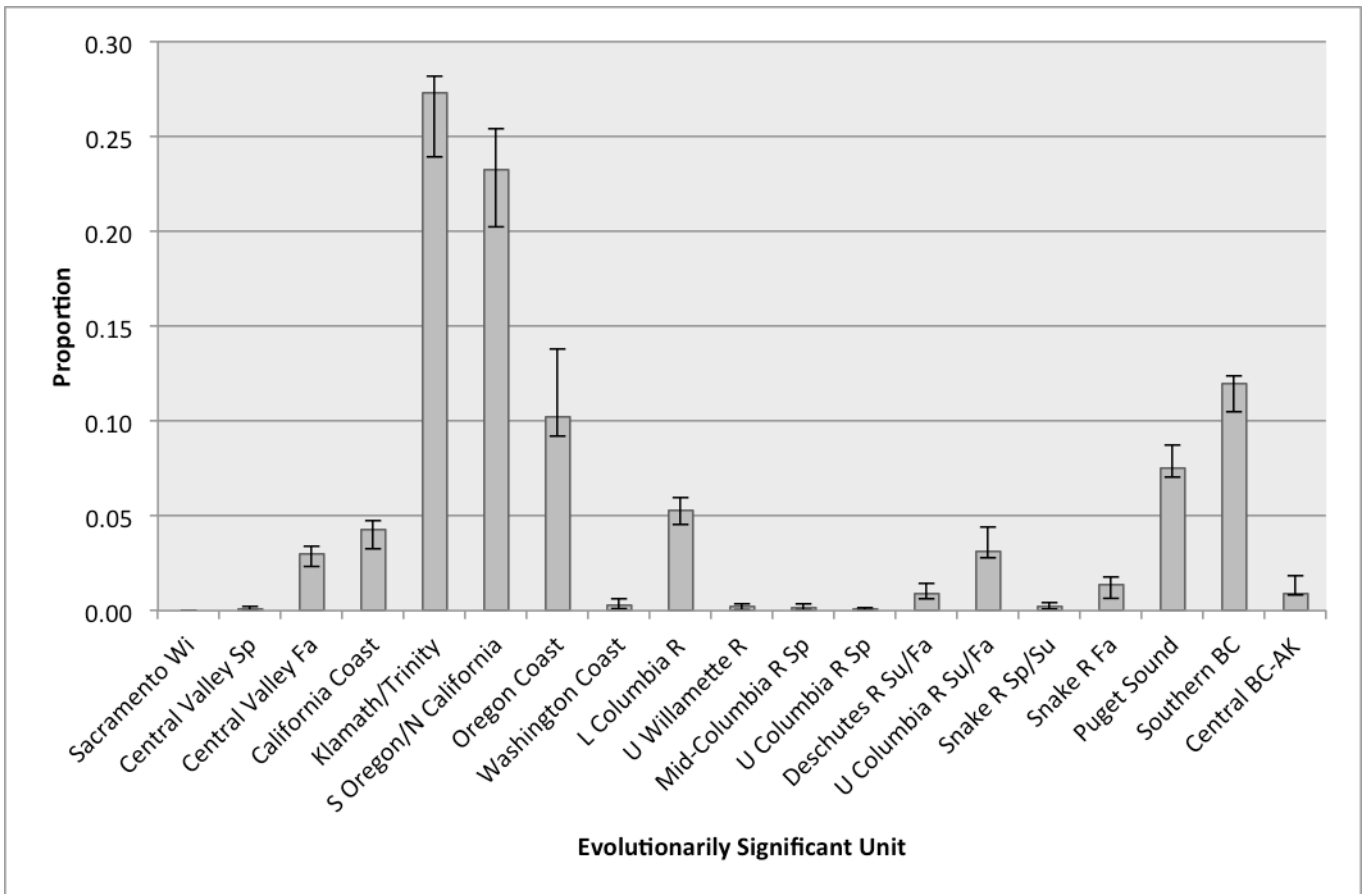



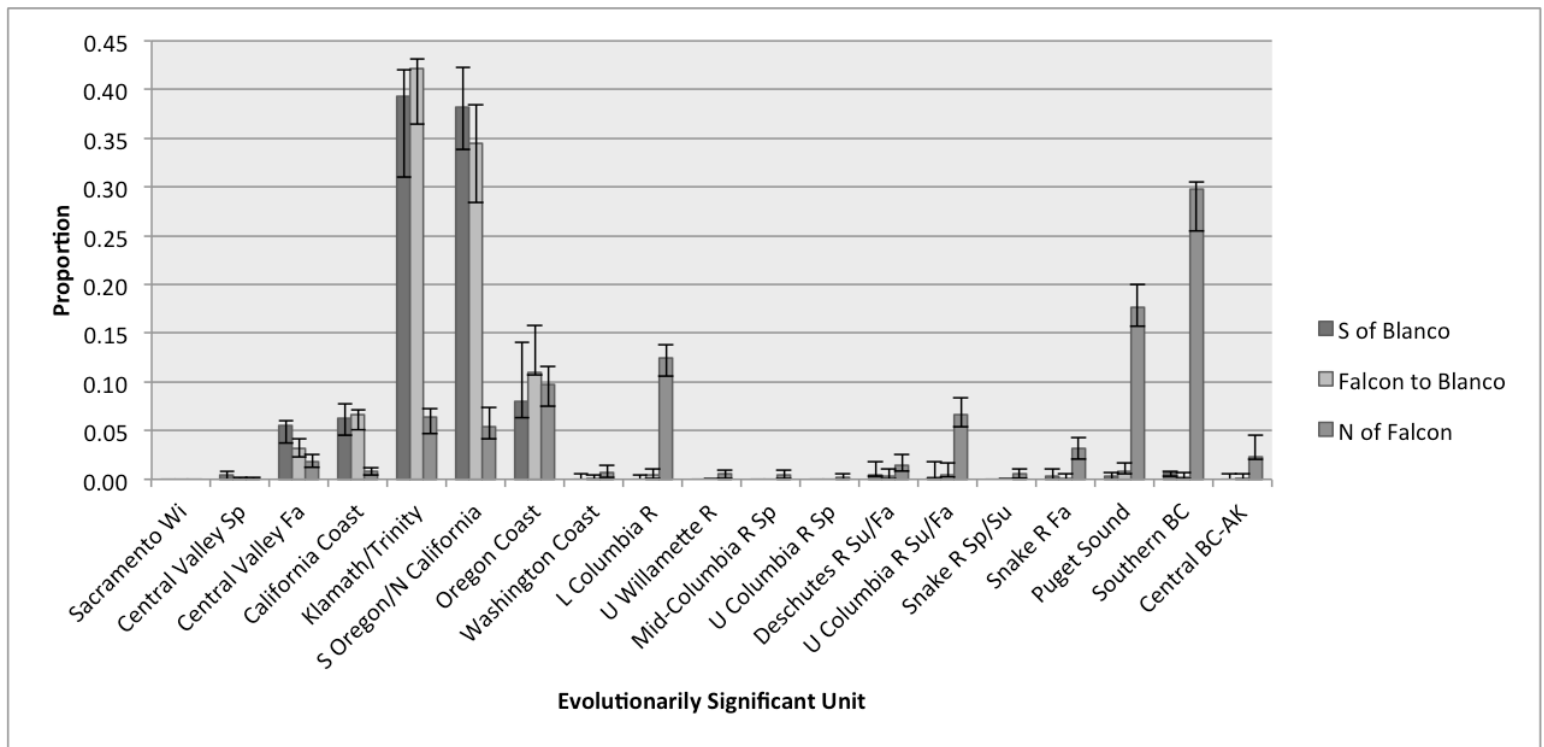

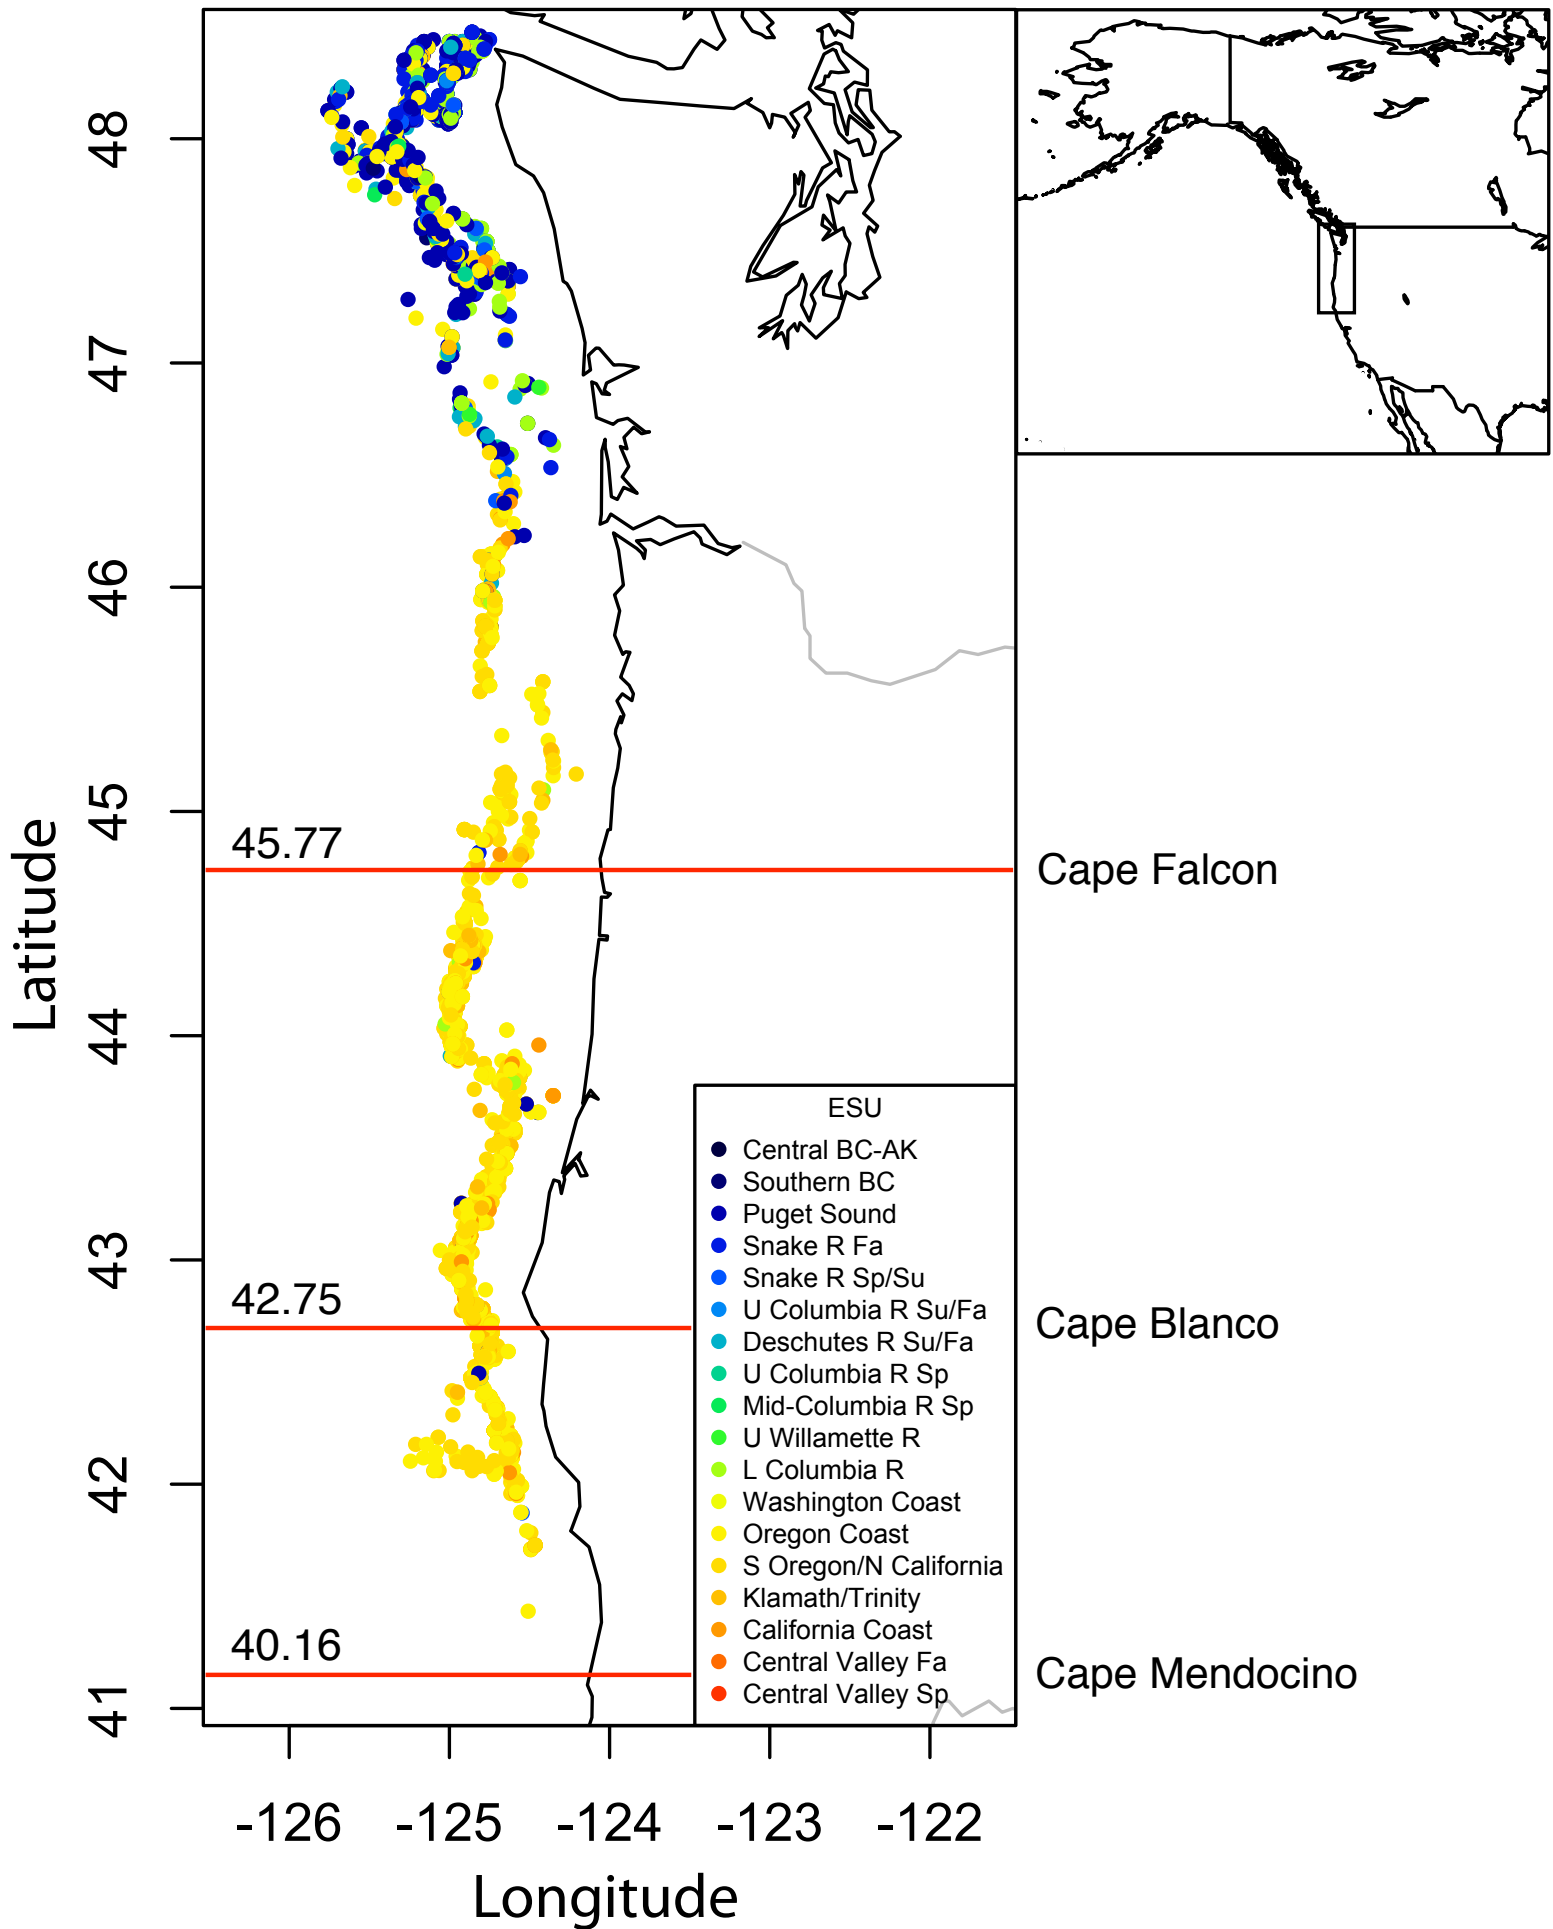

### Northern ESUs

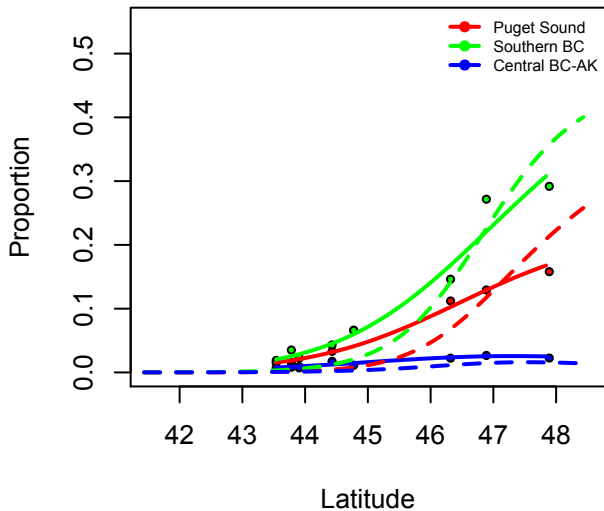

### Columbia ESUs

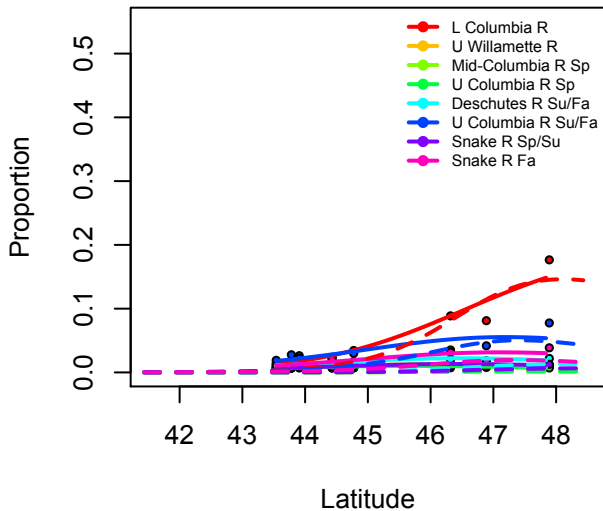

### Coastal ESUs

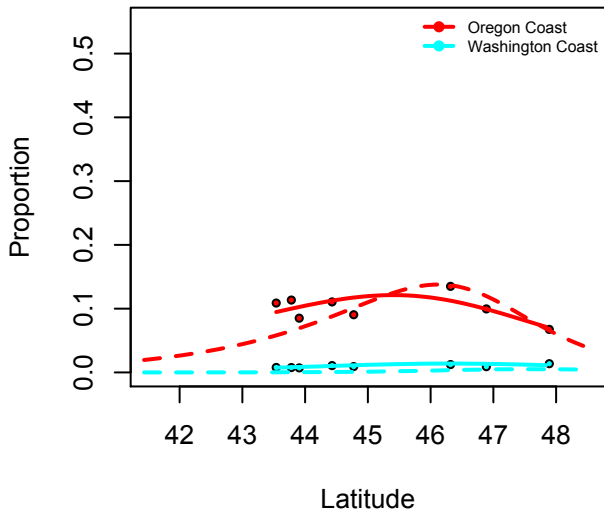

### Southern ESUs

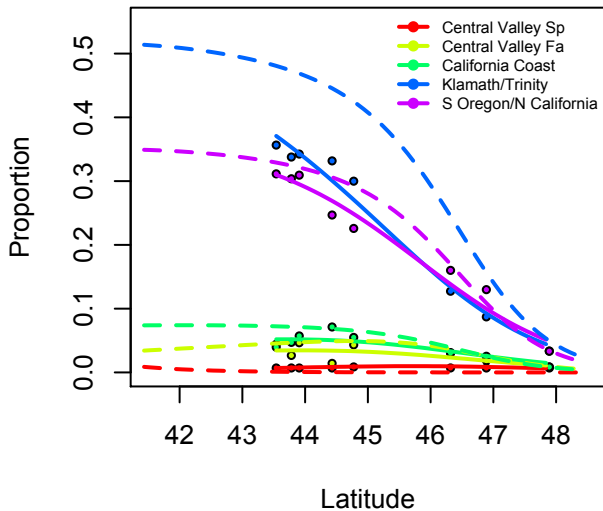

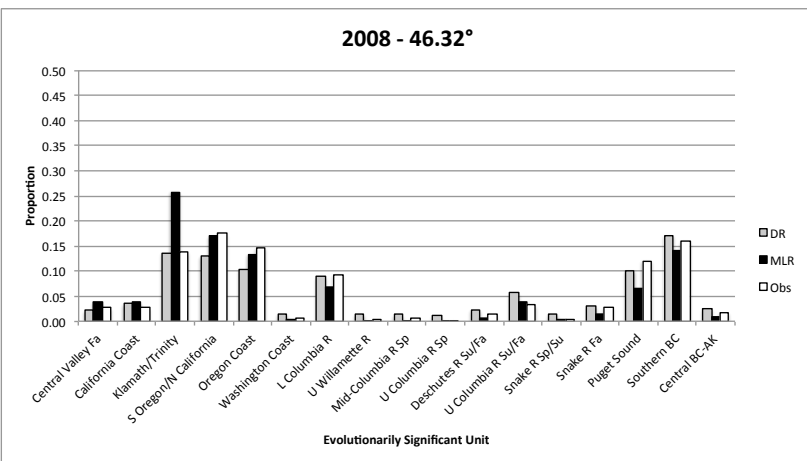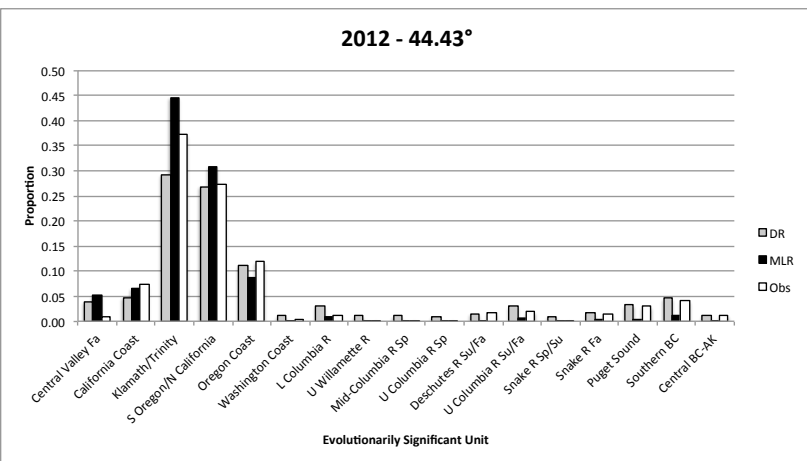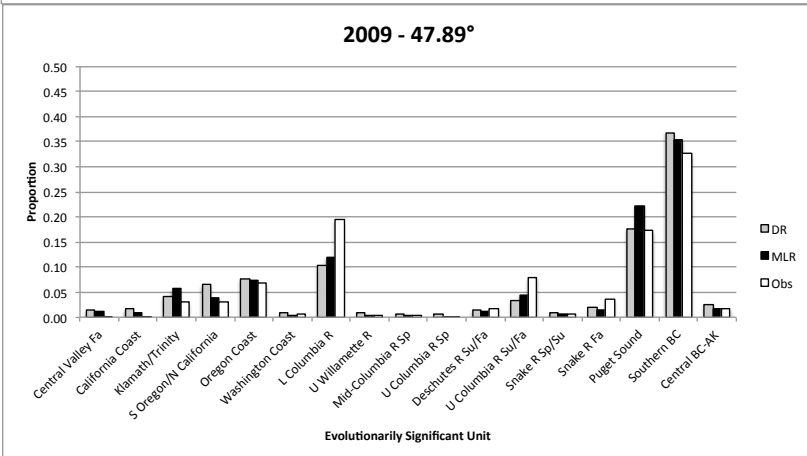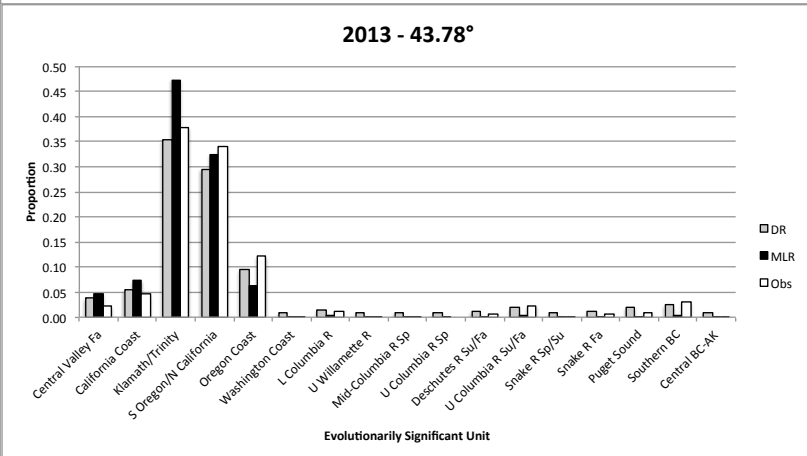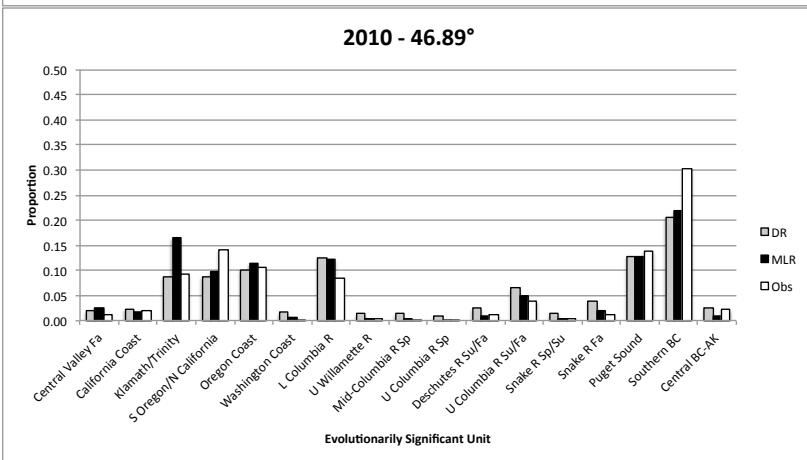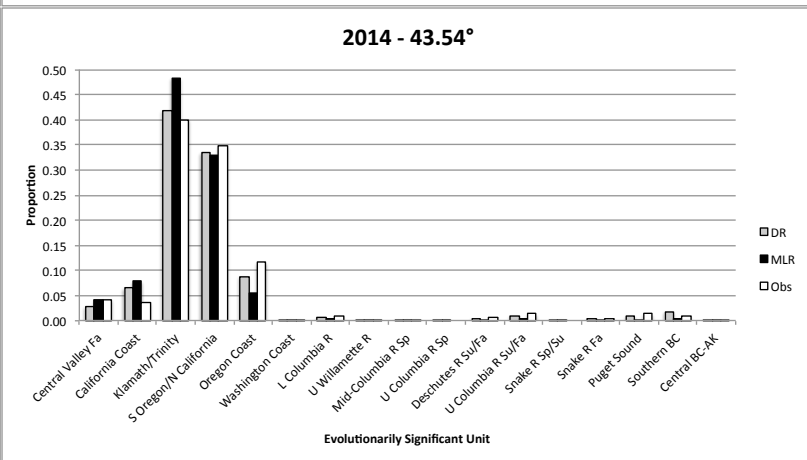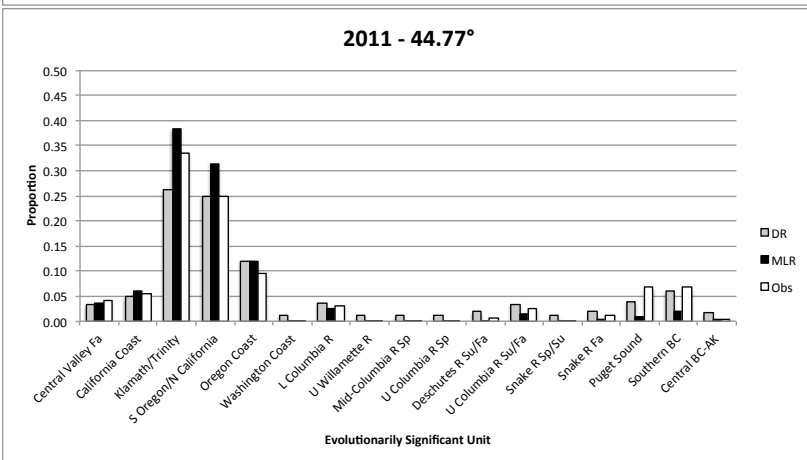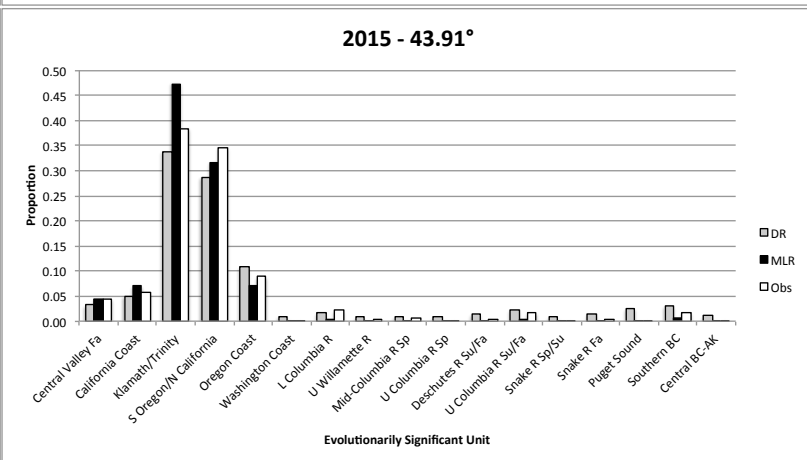

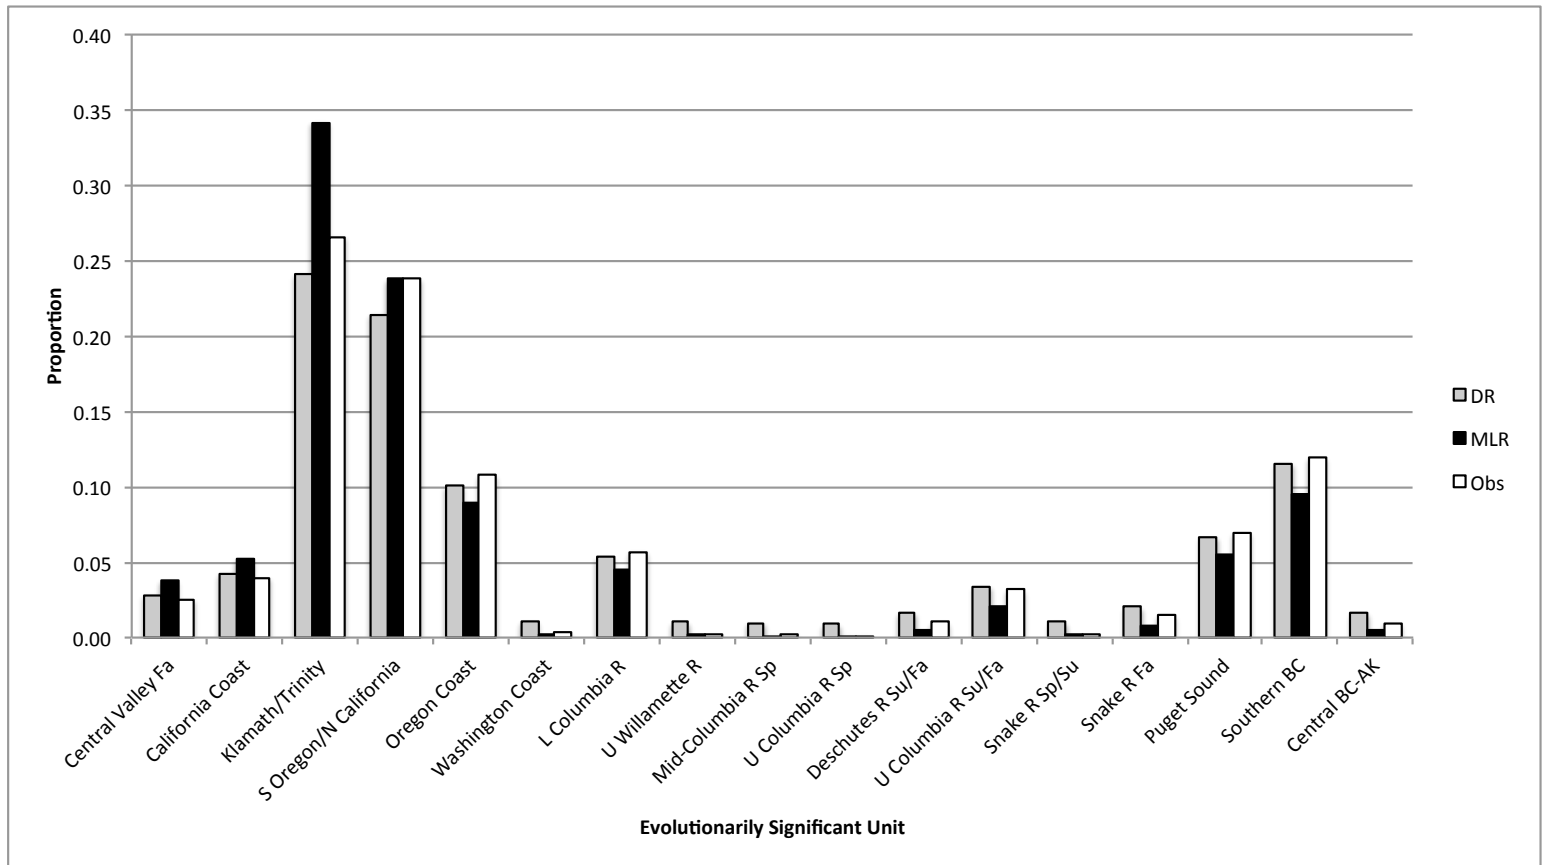

Source: http://biorxiv.org/content/10.1101/2021.11.29.470462v1.full.pdf
